# Supplementary material for: The simultaneous modulation effect of N-substituents on the photochromic and electrochromic properties of naphthalenediimide-based coordination polymers
Source: Royal Society of Chemistry journal article supplement (doi:10.1039/d3qi02458j), 2024-01-01
Supplement: d3qi02458j1.pdf [file d3qi02458j1.pdf]

## Electronic supplementary information (ESI)

### The simultaneous modulation effect of *N*-substituents on photochromic and electrochromic properties of naphthalenediimide-based coordination polymers

Shimin Zhang, Pengfei Hao,\* Yifang zhang, Gaopeng Li, Junju Shen and  
Yunlong Fu\*

Key Laboratory of Magnetic Molecules & Magnetic Information Materials Ministry of  
Education, School of Chemical and Material Science, Shanxi Normal University,  
Taiyuan 030031, China

E-mail address: haopengfei\_2015@126.com; yunlongfu@sxnu.edu.cn.

#### Content

|                                                                                                                                                                                                    |   |
|----------------------------------------------------------------------------------------------------------------------------------------------------------------------------------------------------|---|
| 1. Experimental Section .....                                                                                                                                                                      | 2 |
| Preparation of the <b>1</b> @FTO film and <b>2</b> @FTO film working electrode.....                                                                                                                | 2 |
| 2. Figures .....                                                                                                                                                                                   | 3 |
| Fig. S1. (a) PXRD patterns of <b>1</b> and <b>1P</b> at room temperature. (b) PXRD patterns of <b>2</b> and <b>2P</b> at room temperature.....                                                     | 3 |
| Fig. S2. (a) TGA curve of <b>1</b> . (b) TGA curve of <b>2</b> . .....                                                                                                                             | 3 |
| Fig. S3. (a) The stability of <b>1</b> and <b>1</b> @FTO film. (b) The stability of <b>2</b> and <b>2</b> @FTO film. ....                                                                          | 3 |
| Fig. S4. (a) The optical band gaps of <b>1</b> . (b) The optical band gaps of <b>2</b> . .....                                                                                                     | 4 |
| Fig. S5. (a) UV-vis absorption spectra of the original sample and decoloration sample of <b>1</b> . (b) ERP spectra of the original sample and decoloration sample of <b>1</b> . .....             | 4 |
| Fig. S6. (a) FT-IR spectra of <b>1</b> and <b>1P</b> . (b) FT-IR spectra of <b>2</b> and <b>2P</b> .....                                                                                           | 4 |
| Fig. S7. (a) The kinetics curve of <b>1</b> (inset: coloration rate constant values of <b>1</b> ). (b) The kinetics curve of <b>2</b> (inset: coloration rate constant values of <b>2</b> ). ..... | 5 |
| Fig. S8. Time-dependent UV-vis absorption spectra of Na <sub>2</sub> CMNDI/H <sub>2</sub> O solution (600 μM)                                                                                      |   |

|                                                                                                                                                                                               |   |
|-----------------------------------------------------------------------------------------------------------------------------------------------------------------------------------------------|---|
| (insert: (a) Photochromic behavior of Na <sub>2</sub> CMNDI/H <sub>2</sub> O solution and (b) EPR spectra of Na <sub>2</sub> CMNDI/H <sub>2</sub> O solution after UV light irradiation)..... | 5 |
| Fig. S9. (a) Electronic photo of suspension of <b>1</b> . (b) Electronic photo of suspension of <b>2</b> .<br>.....                                                                           | 5 |
| 3. Tables.....                                                                                                                                                                                | 6 |
| Table S1. Crystallographic data and refinement parameters of <b>1</b> and <b>2</b> . ....                                                                                                     | 6 |
| Table S2. Selected bond lengths (Å) and angles (°) of <b>1</b> .....                                                                                                                          | 7 |
| Table S3. Selected bond lengths (Å) and angles (°) of <b>2</b> .....                                                                                                                          | 8 |
| Table S4. Hydrogen bonds of <b>1</b> (Å and °). ....                                                                                                                                          | 8 |
| Table S5. Hydrogen bonds of <b>2</b> (Å and °). ....                                                                                                                                          | 9 |

## 1. Experimental Section

### Preparation of the 1@FTO film and 2@FTO film working electrode

The FTO glass is cleaned with soap water and rinsed with deionized water. Then, the FTO glass is treated ultrasonically in ethanol and acetone and subsequently dried in the air. Compound **1** is finely ground. **1** (30 mg) and H<sub>2</sub>O (200  $\mu$ L) are added to the bottle and the mixture is treated ultrasonically for 30 min. The suspension is evenly dispersed on FTO glass by a pipette gun and allowed to dry at room temperature. Afterwards, the 1@FTO film is heated at 60 °C for 5 h. 2@FTO film is prepared in the same way.

## 2. Figures

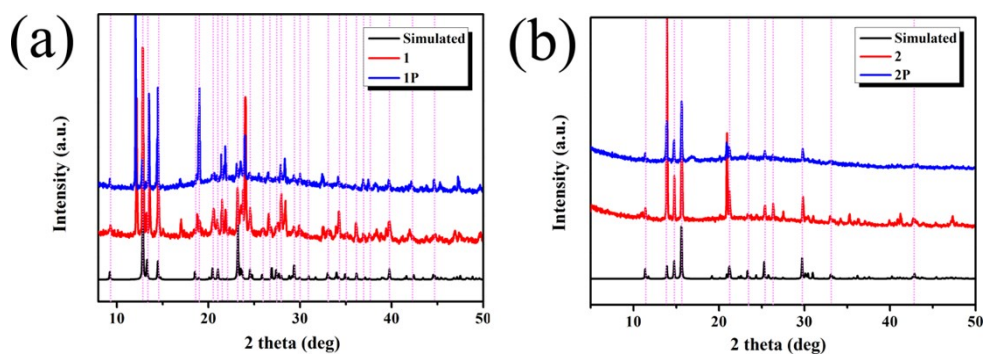

**Fig. S1.** (a) XRD patterns of **1** and **1P** at room temperature. (b) XRD patterns of **2** and **2P** at room temperature.

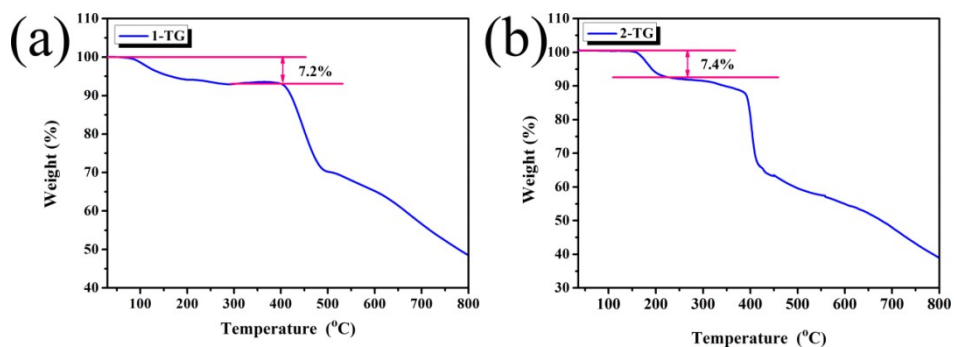

**Fig. S2.** (a) TGA curve of **1**. (b) TGA curve of **2**.

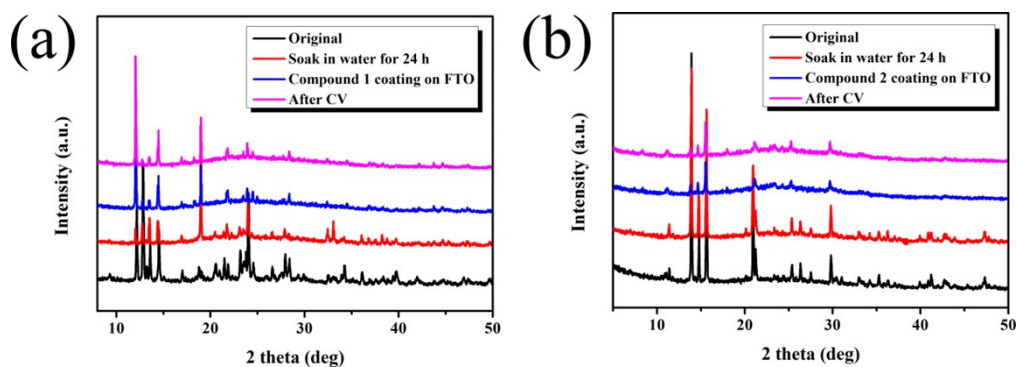

Fig. S3. (a) The stability of **1** and **1@FTO** film. (b) The stability of **2** and **2@FTO** film.

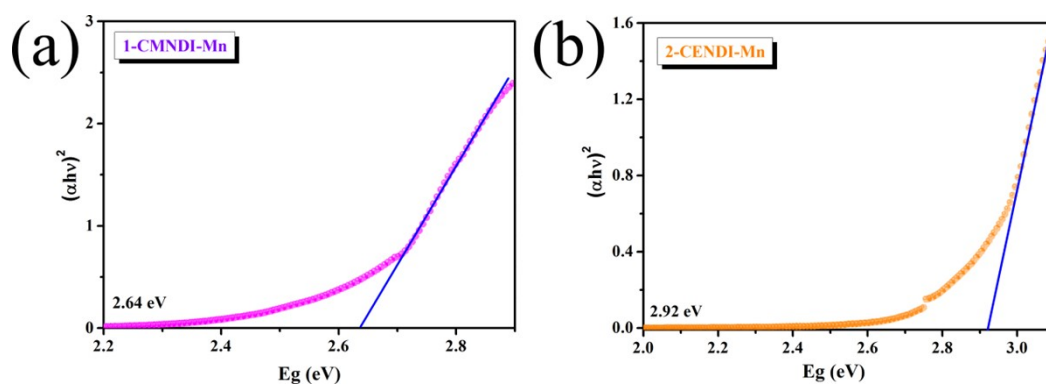

Fig. S4. (a) The optical band gaps of **1**. (b) The optical band gaps of **2**.

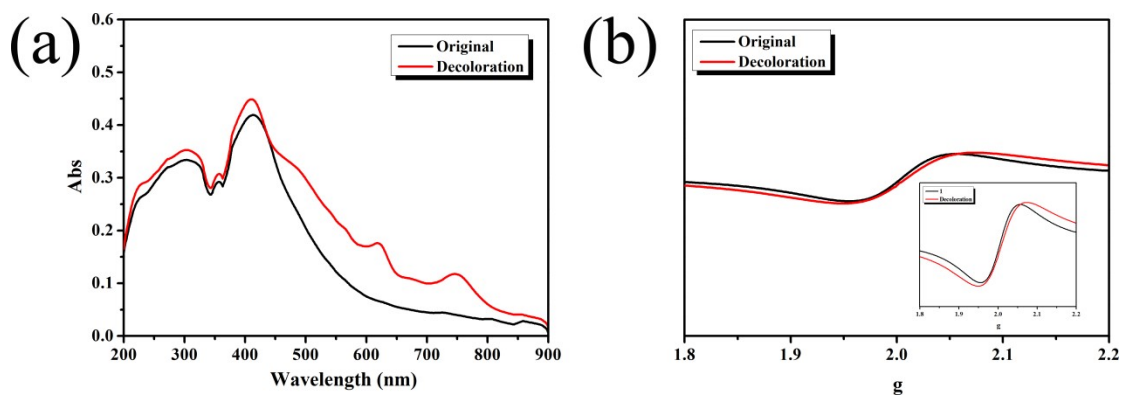

Fig. S5. (a) UV-vis absorption spectra of the original sample and decoloration sample of **1**. (b) ERP spectra of the original sample and decoloration sample of **1**.

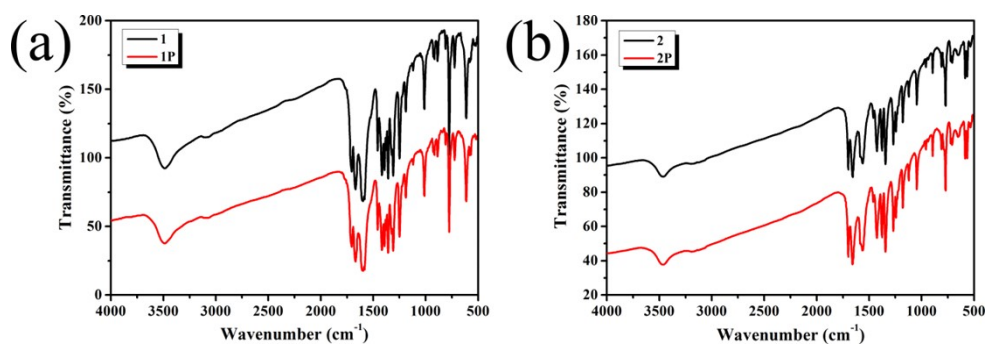

**Fig. S6.** (a) FT-IR spectra of **1** and **1P**. (b) FT-IR spectra of **2** and **2P**.

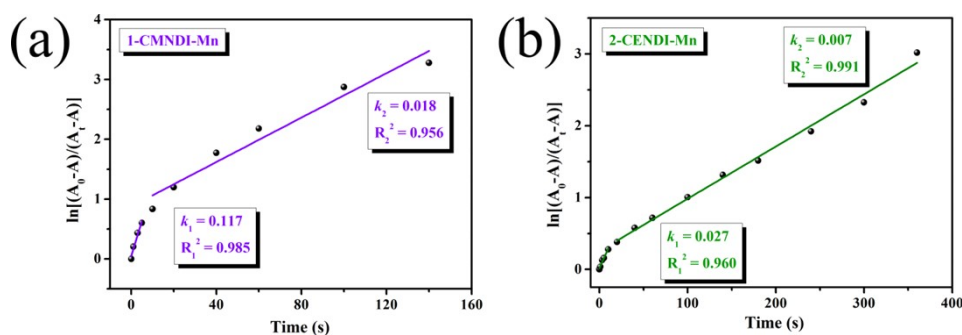

**Fig. S7.** (a) The kinetics curve of **1** (inset: coloration rate constant values of **1**). (b) The kinetics curve of **2** (inset: coloration rate constant values of **2**).

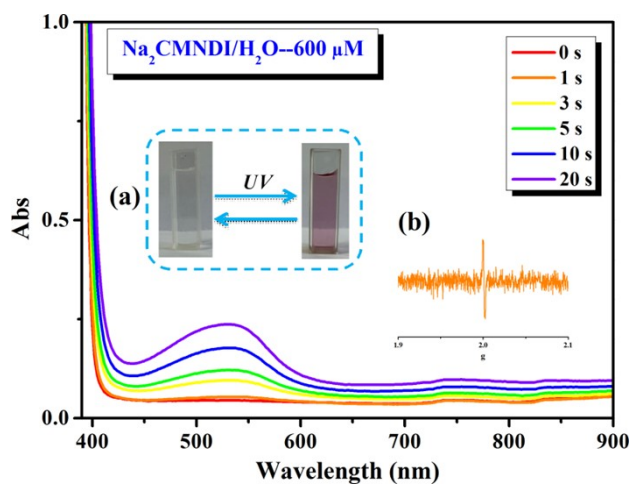

**Fig. S8.** Time-dependent UV-vis absorption spectra of  $\text{Na}_2\text{CMNDI}/\text{H}_2\text{O}$  solution ( $600 \mu\text{M}$ ) (insert: (a) Photochromic behavior of  $\text{Na}_2\text{CMNDI}/\text{H}_2\text{O}$  solution and (b) EPR spectra of  $\text{Na}_2\text{CMNDI}/\text{H}_2\text{O}$  solution after UV light irradiation).

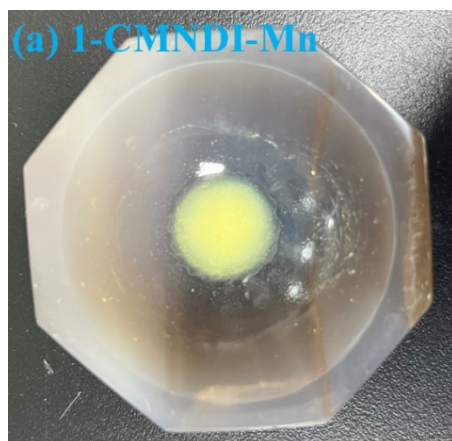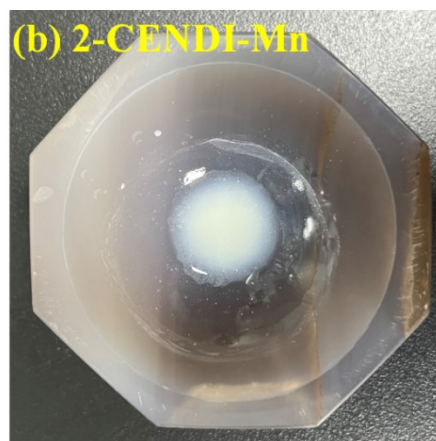

**Fig. S9.** (a) Electronic photo of suspension of **1**. (b) Electronic photo of suspension of **2**.

### 3. Tables

**Table S1.** Crystallographic data and refinement parameters of **1** and **2**.

| Compound                                                                                              | <b>1</b>                                                          | <b>2</b>                                                          |
|-------------------------------------------------------------------------------------------------------|-------------------------------------------------------------------|-------------------------------------------------------------------|
| Empirical formula                                                                                     | C <sub>18</sub> H <sub>12</sub> N <sub>2</sub> O <sub>10</sub> Mn | C <sub>20</sub> H <sub>16</sub> N <sub>2</sub> O <sub>10</sub> Mn |
| Formula weight                                                                                        | 471.24                                                            | 499.29                                                            |
| Temperature (K)                                                                                       | 293(2)                                                            | 293(2)                                                            |
| Crystal system                                                                                        | monoclinic                                                        | triclinic                                                         |
| Space group                                                                                           | <i>P</i> 2 <sub>1</sub> / <i>c</i>                                | <i>P</i> -1                                                       |
| <i>a</i> (Å)                                                                                          | 4.694(3)                                                          | 4.6642(5)                                                         |
| <i>b</i> (Å)                                                                                          | 13.298(9)                                                         | 8.0332(8)                                                         |
| <i>c</i> (Å)                                                                                          | 13.810(9)                                                         | 13.2151(14)                                                       |
| $\alpha$ (°)                                                                                          | 90                                                                | 103.832(3)                                                        |
| $\beta$ (°)                                                                                           | 94.671(16)                                                        | 96.102(3)                                                         |
| $\gamma$ (°)                                                                                          | 90                                                                | 94.089(3)                                                         |
| <i>V</i> (Å <sup>3</sup> )                                                                            | 859.2(9)                                                          | 475.66(9)                                                         |
| <i>Z</i>                                                                                              | 2                                                                 | 1                                                                 |
| <i>D<sub>c</sub></i> (g cm <sup>-3</sup> )                                                            | 1.821                                                             | 1.743                                                             |
| $\mu$ (mm <sup>-1</sup> )                                                                             | 0.838                                                             | 0.762                                                             |
| <i>F</i> (000)                                                                                        | 478.00                                                            | 255.0                                                             |
| Radiation                                                                                             | MoK $\alpha$ ( $\lambda$ = 0.71073)                               | MoK $\alpha$ ( $\lambda$ = 0.71073)                               |
| $\vartheta$ range (°)                                                                                 | 4.258 to 56.778                                                   | 6.402 to 56.836                                                   |
| Reflections collected                                                                                 | 12356                                                             | 6042                                                              |
| Unique reflections                                                                                    | 2144                                                              | 2387                                                              |
| <i>R</i> <sub>int</sub>                                                                               | 0.0763                                                            | 0.0469                                                            |
| Data/restraints/parameters                                                                            | 2144/0/142                                                        | 2387/0/152                                                        |
| Goodness-of-fit on <i>F</i> <sup>2</sup>                                                              | 1.052                                                             | 1.055                                                             |
| <i>R</i> <sub>1</sub> / <i>wR</i> <sub>2</sub> , [ <i>I</i> ≥ 2 $\sigma$ ( <i>I</i> )] <sup>a,b</sup> | 0.0487/0.1084                                                     | 0.0407/0.0889                                                     |
| <i>R</i> <sub>1</sub> / <i>wR</i> <sub>2</sub> , (all data)                                           | 0.0962/0.1230                                                     | 0.0566/0.0941                                                     |
| $\Delta\rho_{\max}/\Delta\rho_{\min}$ (e Å <sup>-3</sup> )                                            | 0.43/-0.40                                                        | 0.35/-0.43                                                        |

$${}^a R_1 = \sum ||F_o| - |F_c|| / \sum |F_o|$$

$${}^b wR_2 = [\sum w(F_o^2 - F_c^2)^2 / \sum w(F_o^2)^2]^{1/2}$$

**Table S2.** Selected bond lengths (Å) and angles (°) of **1**.

| Compound <b>1</b>                    |           |                                      |           |
|--------------------------------------|-----------|--------------------------------------|-----------|
| Mn1-O3 <sup>1</sup>                  | 2.221 (2) | Mn1-O4                               | 2.155 (2) |
| Mn1-O3 <sup>2</sup>                  | 2.221 (2) | Mn1-O5                               | 2.174 (2) |
| Mn1-O4 <sup>3</sup>                  | 2.155 (2) | Mn1-O5 <sup>3</sup>                  | 2.174 (2) |
| O3 <sup>1</sup> -Mn1-O3 <sup>2</sup> | 180.0     | O4-Mn1-O5                            | 92.52 (9) |
| O4-Mn1-O3 <sup>1</sup>               | 88.56 (8) | O4 <sup>3</sup> -Mn1-O5 <sup>3</sup> | 92.53 (9) |
| O4-Mn1-O3 <sup>2</sup>               | 91.44 (8) | O5 <sup>3</sup> -Mn1-O3 <sup>2</sup> | 88.21 (8) |
| O4 <sup>3</sup> -Mn1-O3 <sup>2</sup> | 88.56 (8) | O5-Mn1-O3 <sup>2</sup>               | 91.79 (8) |
| O4 <sup>3</sup> -Mn1-O3 <sup>1</sup> | 91.44 (8) | O5 <sup>3</sup> -Mn1-O3 <sup>1</sup> | 91.79 (8) |
| O4-Mn1-O4 <sup>3</sup>               | 180.0     | O5-Mn1-O3 <sup>1</sup>               | 88.21 (8) |
| O4-Mn1-O5 <sup>3</sup>               | 87.48 (9) | O5 <sup>3</sup> -Mn1-O5              | 180.0     |
| O4 <sup>3</sup> -Mn1-O5              | 87.48 (9) |                                      |           |

symmetry codes: <sup>1</sup>-x, 2-y, 1-z; <sup>2</sup>1+x, y, z; <sup>3</sup>1-x, 2-y, 1-z.

**Table S3.** Selected bond lengths (Å) and angles (°) of **2**.

| Compound <b>2</b>                    |             |                                      |             |
|--------------------------------------|-------------|--------------------------------------|-------------|
| Mn1-O3 <sup>1</sup>                  | 2.2178 (14) | Mn1-O4                               | 2.1310 (13) |
| Mn1-O3 <sup>2</sup>                  | 2.2178 (14) | Mn1-O5                               | 2.2286 (16) |
| Mn1-O4 <sup>3</sup>                  | 2.1310 (13) | Mn1-O5 <sup>3</sup>                  | 2.2286 (16) |
| O3 <sup>1</sup> -Mn1-O3 <sup>2</sup> | 180.00 (7)  | O4 <sup>3</sup> -Mn1-O3 <sup>2</sup> | 89.92 (5)   |
| O3 <sup>2</sup> -Mn1-O5 <sup>3</sup> | 92.77 (6)   | O4 <sup>3</sup> -Mn1-O4              | 180.00 (6)  |
| O3 <sup>1</sup> -Mn1-O5 <sup>3</sup> | 87.23 (6)   | O4-Mn1-O5                            | 91.89 (6)   |
| O3 <sup>2</sup> -Mn1-O5              | 87.23 (6)   | O4 <sup>3</sup> -Mn1-O5              | 88.11 (6)   |
| O3 <sup>1</sup> -Mn1-O5              | 92.77 (6)   | O4-Mn1-O5 <sup>3</sup>               | 88.11 (6)   |



|                                      |           |                                      |           |
|--------------------------------------|-----------|--------------------------------------|-----------|
| O4-Mn1-O3 <sup>1</sup>               | 89.92 (5) | O4 <sup>3</sup> -Mn1-O5 <sup>3</sup> | 91.89 (6) |
| O4 <sup>3</sup> -Mn1-O3 <sup>1</sup> | 90.08 (5) | O5 <sup>3</sup> -Mn1-O5              | 180.0     |
| O4-Mn1-O3 <sup>2</sup>               | 90.08 (5) |                                      |           |

symmetry codes: <sup>1</sup>1-x, -y, -z; <sup>2</sup>1+x, y, z; <sup>3</sup>2-x, -y, -z.

**Table S4.** Hydrogen bonds of **1** (Å and °).

| Compound 1               |        |          |           |        |
|--------------------------|--------|----------|-----------|--------|
| D-H...A                  | d(D-H) | d(H...A) | d(D...A)  | <(DHA) |
| O5-H5A...O1 <sup>1</sup> | 0.85   | 2.02     | 2.800(3)  | 150.9  |
| O5-H5B...O3 <sup>2</sup> | 0.85   | 2.14     | 2.837 (3) | 138.3  |

Symmetry codes: <sup>1</sup>1-x, 2-y, 1-z; <sup>2</sup>1+x, y, z.

**Table S5.** Hydrogen bonds of **2** (Å and °).

| Compound 2               |        |          |           |        |
|--------------------------|--------|----------|-----------|--------|
| D-H...A                  | d(D-H) | d(H...A) | d(D...A)  | <(DHA) |
| O5-H5A...O3 <sup>1</sup> | 0.85   | 2.05     | 2.786 (2) | 145.1  |
| O5-H5B...O2 <sup>2</sup> | 0.85   | 1.98     | 2.826 (2) | 170.4  |

Symmetry codes: <sup>1</sup>2-x, -y, -z; <sup>2</sup>2+x, -1+y, z.
